# Supplementary material
Source: PubMed Central journal article supplement (PMC2596921)

**Supplemental Table I.** Summary of the SNPs from HapMap Caucasian database used for tagSNP selection. SNPs with the same number in the LD cluster column were placed in the same LD cluster ( $r^2 \geq 0.95$ ) by the Tagger program. See Supplemental Figure II for a graphical presentation of the distributions of the LD clusters across the ROCK2 locus.

| SNP        | Map        | Location      | LD Cluster | MAF   |
|------------|------------|---------------|------------|-------|
| rs3911110  | 11,269,075 | 3'-UTR        | 1          | 0.193 |
| rs11694729 | 11,295,344 | Intron 21     | 1          | 0.203 |
| rs10454126 | 11,299,794 | Intron 20     | 1          | 0.203 |
| rs6721445  | 11,346,706 | Intron 3      | 1          | 0.203 |
| rs10194620 | 11,357,739 | Intron 3      | 1          | 0.21  |
| rs11695377 | 11,365,105 | Intron 3      | 1          | 0.2   |
| rs7593091  | 11,375,059 | Intron 3      | 1          | 0.2   |
| rs12692434 | 11,393,181 | Intron 1      | 1          | 0.198 |
| rs6733312  | 11,397,105 | Intron 1      | 1          | 0.198 |
| rs6713273  | 11,398,932 | Intron 1      | 1          | 0.2   |
| rs1562748  | 11,401,203 | Intron 1      | 1          | 0.2   |
| rs6749456  | 11,401,223 | Intron 1      | 1          | 0.2   |
| rs10203916 | 11,402,582 | Intron 1      | 1          | 0.2   |
| rs7355446  | 11,404,091 | Intron 1      | 1          | 0.198 |
| rs7563928  | 11,404,463 | Intron 1      | 1          | 0.198 |
| rs10210600 | 11,404,728 | Intron 1      | 1          | 0.188 |
| rs6432186  | 11,405,876 | Intron 1      | 1          | 0.2   |
| rs6755196  | 11,410,923 | Intron 1      | 1          | 0.2   |
| rs753770   | 11,416,120 | Intron 1      | 1          | 0.2   |
| rs2084577  | 11,416,687 | Intron 1      | 1          | 0.2   |
| rs4669710  | 11,417,111 | Intron 1      | 1          | 0.2   |
| rs13014721 | 11,421,331 | Intron 1      | 1          | 0.188 |
| rs4669713  | 11,429,137 | Intron 1      | 1          | 0.2   |
| rs12692437 | 11,431,159 | Intron 1      | 1          | 0.2   |
| rs12996399 | 11,264,437 | 3'-UTR        | 2          | 0.39  |
| rs921322   | 11,270,258 | 3'-UTR        | 2          | 0.373 |
| rs8996     | 11,271,475 | 3'-UTR        | 2          | 0.375 |
| rs978906   | 11,273,874 | Exon 34 (UTR) | 2          | 0.361 |
| rs6753921  | 11,277,353 | Intron 33     | 2          | 0.375 |
| rs12470004 | 11,286,630 | Intron 28     | 2          | 0.375 |
| rs17366657 | 11,295,112 | Intron 21     | 2          | 0.373 |
| rs13424069 | 11,298,059 | Intron 21     | 2          | 0.373 |
| rs1546597  | 11,298,854 | Intron 20     | 2          | 0.375 |
| rs1546598  | 11,300,688 | Intron 19     | 2          | 0.375 |
| rs12475086 | 11,301,202 | Intron 19     | 2          | 0.373 |
| rs13022598 | 11,302,936 | Intron 18     | 2          | 0.362 |
| rs10495582 | 11,304,906 | Intron 18     | 2          | 0.375 |
| rs726843   | 11,306,788 | Intron 14     | 2          | 0.375 |
| rs10168084 | 11,317,349 | Intron 6      | 2          | 0.375 |
| rs1515219  | 11,319,676 | Intron 5      | 2          | 0.383 |
| rs17366874 | 11,322,239 | Intron 5      | 2          | 0.379 |
| rs7589629  | 11,323,805 | Intron 5      | 2          | 0.392 |
| rs11680818 | 11,324,798 | Intron 5      | 2          | 0.39  |
| rs6728627  | 11,332,994 | Intron 4      | 2          | 0.39  |
| rs10192483 | 11,334,315 | Intron 4      | 2          | 0.39  |

|            |            |           |    |       |
|------------|------------|-----------|----|-------|
| rs12478098 | 11,335,116 | Intron 4  | 2  | 0.39  |
| rs6716447  | 11,336,173 | Intron 4  | 2  | 0.381 |
| rs3771106  | 11,340,710 | Intron 3  | 2  | 0.383 |
| rs6730673  | 11,344,270 | Intron 3  | 3  | 0.254 |
| rs7568064  | 11,345,597 | Intron 3  | 3  | 0.242 |
| rs6759490  | 11,351,763 | Intron 3  | 3  | 0.233 |
| rs10192593 | 11,352,010 | Intron 3  | 3  | 0.241 |
| rs7558664  | 11,355,844 | Intron 3  | 3  | 0.246 |
| rs4668720  | 11,356,412 | Intron 3  | 3  | 0.242 |
| rs12692433 | 11,359,291 | Intron 3  | 3  | 0.263 |
| rs7563468  | 11,381,873 | Intron 1  | 3  | 0.246 |
| rs7575837  | 11,395,474 | Intron 1  | 3  | 0.242 |
| rs12692435 | 11,395,696 | Intron 1  | 3  | 0.246 |
| rs6736240  | 11,401,030 | Intron 1  | 3  | 0.241 |
| rs2122384  | 11,401,910 | Intron 1  | 3  | 0.241 |
| rs12994807 | 11,402,043 | Intron 1  | 3  | 0.237 |
| rs7355489  | 11,403,902 | Intron 1  | 3  | 0.242 |
| rs12992581 | 11,406,971 | Intron 1  | 3  | 0.246 |
| rs6755337  | 11,410,883 | Intron 1  | 3  | 0.242 |
| rs10929732 | 11,434,090 | Intron 1  | 3  | 0.242 |
| rs13018466 | 11,267,824 | 3'-UTR    | 4  | 0.423 |
| rs2011812  | 11,290,796 | Intron 24 | 4  | 0.417 |
| rs17366643 | 11,295,102 | Intron 21 | 4  | 0.409 |
| rs13423864 | 11,297,847 | Intron 21 | 4  | 0.424 |
| rs7598032  | 11,303,798 | Intron 18 | 4  | 0.415 |
| rs9808232  | 11,309,718 | Exon 10   | 4  | 0.417 |
| rs2056103  | 11,315,354 | Intron 6  | 4  | 0.425 |
| rs13393192 | 11,319,264 | Intron 5  | 4  | 0.414 |
| rs13397757 | 11,321,366 | Intron 5  | 4  | 0.414 |
| rs13404430 | 11,331,711 | Intron 4  | 4  | 0.433 |
| rs2044758  | 11,329,046 | Intron 4  | 5  | 0.195 |
| rs9287728  | 11,330,275 | Intron 4  | 5  | 0.195 |
| rs2357996  | 11,331,127 | Intron 4  | 5  | 0.184 |
| rs1868584  | 11,348,481 | Intron 3  | 5  | 0.195 |
| rs965665   | 11,349,473 | Intron 3  | 5  | 0.192 |
| rs6432183  | 11,350,090 | Intron 3  | 5  | 0.195 |
| rs6432184  | 11,350,147 | Intron 3  | 5  | 0.195 |
| rs1562749  | 11,355,875 | Intron 3  | 5  | 0.195 |
| rs2290156  | 11,283,806 | Intron 31 | 6  | 0.308 |
| rs11676201 | 11,322,080 | Intron 5  | 6  | 0.31  |
| rs10187981 | 11,329,270 | Intron 4  | 6  | 0.305 |
| rs1868585  | 11,333,427 | Intron 4  | 6  | 0.305 |
| rs10929727 | 11,334,812 | Intron 4  | 6  | 0.305 |
| rs4303693  | 11,358,814 | Intron 3  | 7  | 0.22  |
| rs10803732 | 11,359,581 | Intron 3  | 7  | 0.216 |
| rs10178332 | 11,359,615 | Intron 3  | 7  | 0.22  |
| rs6710031  | 11,359,715 | Intron 3  | 7  | 0.205 |
| rs7589152  | 11,371,435 | Intron 3  | 8  | 0.4   |
| rs2122383  | 11,387,366 | Intron 1  | 8  | 0.4   |
| rs1901010  | 11,422,701 | Intron 1  | 8  | 0.4   |
| rs16857265 | 11,281,010 | Intron 33 | 9  | 0.068 |
| rs11884214 | 11,320,684 | Intron 5  | 9  | 0.069 |
| rs7593683  | 11,405,690 | Intron 1  | 9  | 0.07  |
| rs6716817  | 11,336,432 | Intron 4  | 10 | 0.5   |

|            |            |          |    |       |
|------------|------------|----------|----|-------|
| rs4477886  | 11,338,892 | Intron 4 | 10 | 0.5   |
| rs4669702  | 11,354,050 | Intron 1 | 11 | 0.288 |
| rs12622447 | 11,426,043 | Intron 1 | 11 | 0.292 |
| rs10929728 | 11,362,081 | Intron 3 | 12 | 0.358 |
| rs7581184  | 11,440,129 | 5'-UTR   | 13 | 0.408 |
| rs10167277 | 11,316,598 | Intron 6 | 14 | 0.379 |
| rs4669708  | 11,397,149 | Intron 1 | 15 | 0.417 |
| rs4669700  | 11,352,136 | Intron 3 | 16 | 0.195 |
| rs17366517 | 11,271,266 | 3'-UTR   | 17 | 0.11  |
| rs12479227 | 11,344,951 | Intron 3 | 18 | 0.059 |

**Supplemental Table II.** ROCK2 SNP physical map locations on chromosome 2, minor allele (M.A.) frequencies (MAF), Hardy-Weinberg equilibrium (HWE) test statistics (p-value) and genotype call rates (%Geno) in the HYPGENE study

| <b>SNP</b> | <b>Position</b> | <b>HWE</b> | <b>%Geno</b> | <b>MAF</b> | <b>M.A.</b> |
|------------|-----------------|------------|--------------|------------|-------------|
| rs17366517 | 11,271,266      | 1          | 100          | 0.064      | G           |
| rs6753921  | 11,277,353      | 0.6411     | 100          | 0.477      | A           |
| rs16857265 | 11,281,010      | 0.6137     | 100          | 0.056      | G           |
| rs9808232  | 11,309,718      | 0.3625     | 100          | 0.48       | C           |
| rs2056103  | 11,315,354      | 0.5503     | 99.8         | 0.475      | T           |
| rs10167277 | 11,316,598      | 0.9839     | 99.7         | 0.336      | A           |
| rs10929727 | 11,334,812      | 0.5488     | 99.8         | 0.279      | G           |
| rs4477886  | 11,338,892      | 0.5008     | 100          | 0.451      | A           |
| rs12479227 | 11,344,951      | 0.6866     | 100          | 0.053      | A           |
| rs965665   | 11,349,473      | 0.9515     | 100          | 0.128      | C           |
| rs4669700  | 11,352,136      | 0.5186     | 99.8         | 0.216      | G           |
| rs4669702  | 11,354,050      | 0.5639     | 100          | 0.279      | A           |
| rs10178332 | 11,359,615      | 0.9401     | 99.8         | 0.131      | C           |
| rs10929728 | 11,362,081      | 0.9494     | 100          | 0.336      | G           |
| rs2122383  | 11,387,366      | 0.8746     | 100          | 0.48       | T           |
| rs6755196  | 11,410,923      | 0.9331     | 100          | 0.131      | A           |
| rs10929732 | 11,434,090      | 0.6142     | 100          | 0.182      | A           |
| rs7581184  | 11,440,129      | 0.5242     | 100          | 0.381      | G           |

**Supplemental Table III.** Pairwise linkage disequilibria ( $D'$  above and  $r^2$  below diagonal) among the ROCK2 SNPs in the HYPGENE cohort.

| #  | SNP        | 1    | 2    | 3    | 4    | 5    | 6    | 7    | 8    | 9    | 10   | 11   | 12   | 13   | 14   | 15   | 16   | 17   | 18   |
|----|------------|------|------|------|------|------|------|------|------|------|------|------|------|------|------|------|------|------|------|
| 1  | rs17366517 |      | 1.00 | 1.00 | 1.00 | 1.00 | 1.00 | 0.99 | 1.00 | 1.00 | 1.00 | 1.00 | 0.99 | 1.00 | 1.00 | 1.00 | 1.00 | 1.00 | 0.98 |
| 2  | rs6753921  | 0.06 |      | 1.00 | 1.00 | 1.00 | 1.00 | 1.00 | 1.00 | 1.00 | 1.00 | 0.99 | 1.00 | 1.00 | 1.00 | 0.99 | 1.00 | 1.00 | 0.98 |
| 3  | rs16857265 | 0.00 | 0.05 |      | 1.00 | 1.00 | 1.00 | 1.00 | 1.00 | 0.16 | 0.99 | 1.00 | 1.00 | 1.00 | 1.00 | 1.00 | 1.00 | 1.00 | 0.97 |
| 4  | rs9808232  | 0.07 | 0.84 | 0.06 |      | 1.00 | 1.00 | 1.00 | 0.82 | 1.00 | 1.00 | 1.00 | 1.00 | 1.00 | 1.00 | 0.98 | 1.00 | 0.58 | 0.77 |
| 5  | rs2056103  | 0.08 | 0.82 | 0.07 | 0.98 |      | 1.00 | 1.00 | 0.82 | 1.00 | 1.00 | 1.00 | 1.00 | 1.00 | 1.00 | 1.00 | 1.00 | 0.57 | 0.77 |
| 6  | rs10167277 | 0.14 | 0.46 | 0.12 | 0.55 | 0.56 |      | 1.00 | 0.65 | 1.00 | 1.00 | 1.00 | 1.00 | 1.00 | 1.00 | 1.00 | 1.00 | 0.99 | 0.98 |
| 7  | rs10929727 | 0.17 | 0.35 | 0.02 | 0.42 | 0.43 | 0.77 |      | 0.55 | 1.00 | 1.00 | 1.00 | 1.00 | 1.00 | 1.00 | 1.00 | 1.00 | 0.98 | 0.98 |
| 8  | rs4477886  | 0.06 | 0.75 | 0.07 | 0.60 | 0.61 | 0.26 | 0.15 |      | 1.00 | 1.00 | 1.00 | 0.55 | 0.97 | 0.64 | 1.00 | 0.97 | 0.98 | 0.67 |
| 9  | rs12479227 | 0.00 | 0.05 | 0.00 | 0.06 | 0.06 | 0.11 | 0.14 | 0.07 |      | 1.00 | 1.00 | 1.00 | 1.00 | 1.00 | 1.00 | 1.00 | 1.00 | 0.96 |
| 10 | rs965665   | 0.01 | 0.13 | 0.01 | 0.16 | 0.16 | 0.07 | 0.06 | 0.18 | 0.01 |      | 1.00 | 1.00 | 1.00 | 1.00 | 1.00 | 1.00 | 1.00 | 0.92 |
| 11 | rs4669700  | 0.02 | 0.25 | 0.02 | 0.30 | 0.30 | 0.54 | 0.71 | 0.33 | 0.20 | 0.04 |      | 1.00 | 1.00 | 0.99 | 0.99 | 1.00 | 0.97 | 0.98 |
| 12 | rs4669702  | 0.17 | 0.35 | 0.02 | 0.42 | 0.42 | 0.76 | 1.00 | 0.14 | 0.14 | 0.06 | 0.71 |      | 1.00 | 1.00 | 1.00 | 1.00 | 0.98 | 0.98 |
| 13 | rs10178332 | 0.01 | 0.14 | 0.01 | 0.16 | 0.17 | 0.08 | 0.06 | 0.17 | 0.01 | 0.97 | 0.04 | 0.06 |      | 1.00 | 1.00 | 1.00 | 1.00 | 0.92 |
| 14 | rs10929728 | 0.14 | 0.46 | 0.12 | 0.55 | 0.56 | 1.00 | 0.77 | 0.26 | 0.11 | 0.07 | 0.54 | 0.76 | 0.08 |      | 1.00 | 1.00 | 0.99 | 0.98 |
| 15 | rs2122383  | 0.06 | 0.96 | 0.06 | 0.81 | 0.83 | 0.46 | 0.36 | 0.75 | 0.05 | 0.14 | 0.25 | 0.35 | 0.14 | 0.47 |      | 1.00 | 1.00 | 0.98 |
| 16 | rs6755196  | 0.01 | 0.14 | 0.01 | 0.16 | 0.17 | 0.08 | 0.06 | 0.17 | 0.01 | 0.97 | 0.04 | 0.06 | 1.00 | 0.08 | 0.14 |      | 1.00 | 0.92 |
| 17 | rs10929732 | 0.02 | 0.20 | 0.01 | 0.08 | 0.08 | 0.11 | 0.08 | 0.26 | 0.01 | 0.66 | 0.06 | 0.08 | 0.68 | 0.11 | 0.21 | 0.68 |      | 0.32 |
| 18 | rs7581184  | 0.11 | 0.54 | 0.09 | 0.40 | 0.40 | 0.79 | 0.61 | 0.33 | 0.08 | 0.08 | 0.43 | 0.61 | 0.08 | 0.79 | 0.55 | 0.08 | 0.01 |      |

**Supplemental Table IV.** Odds ratios (95% confidence limits) for the risk of hypertension for the SNPs in LD block 2 that were associated with hypertension. 'A/A' refers to common allele homozygotes, 'A/a' to heterozygotes, and 'a/a' to minor allele homozygotes. Odds ratios for the minor allele homozygotes under recessive model were identical to those shown in the table ('A/A'+ 'A/a' as a reference group). All p-values are adjusted for baseline age, cardiorespiratory fitness, body mass index, and follow-up time.

| SNP        | A/A | Odds Ratio (95% CL) |                   |          | p-value   |  |
|------------|-----|---------------------|-------------------|----------|-----------|--|
|            |     | A/a                 | a/a               | Additive | Recessive |  |
| rs965665   | 1   | 1.04 (0.78; 1.38)   | 0.15 (0.04; 0.54) | 0.012    | 0.003     |  |
| rs10178332 | 1   | 1.06 (0.80; 1.40)   | 0.20 (0.07; 0.62) | 0.017    | 0.0047    |  |
| rs6755196  | 1   | 1.05 (0.79; 1.39)   | 0.20 (0.07; 0.62) | 0.017    | 0.0046    |  |
| rs10929732 | 1   | 0.99 (0.77; 1.28)   | 0.40 (0.19; 0.83) | 0.048    | 0.014     |  |

**Supplemental Figure I.** Linkage disequilibrium (LD) block structure of the ROCK2 SNPs in the Caucasian HapMap data.

**Supplemental Figure II.** Size and distribution of the 18 LD clusters at the ROCK2 locus from the Caucasian HapMap data. Number of SNPs in each cluster is indicated and the list of individual SNPs is given in Supplemental Table I. Clusters 12 – 18 consist of a single SNP.

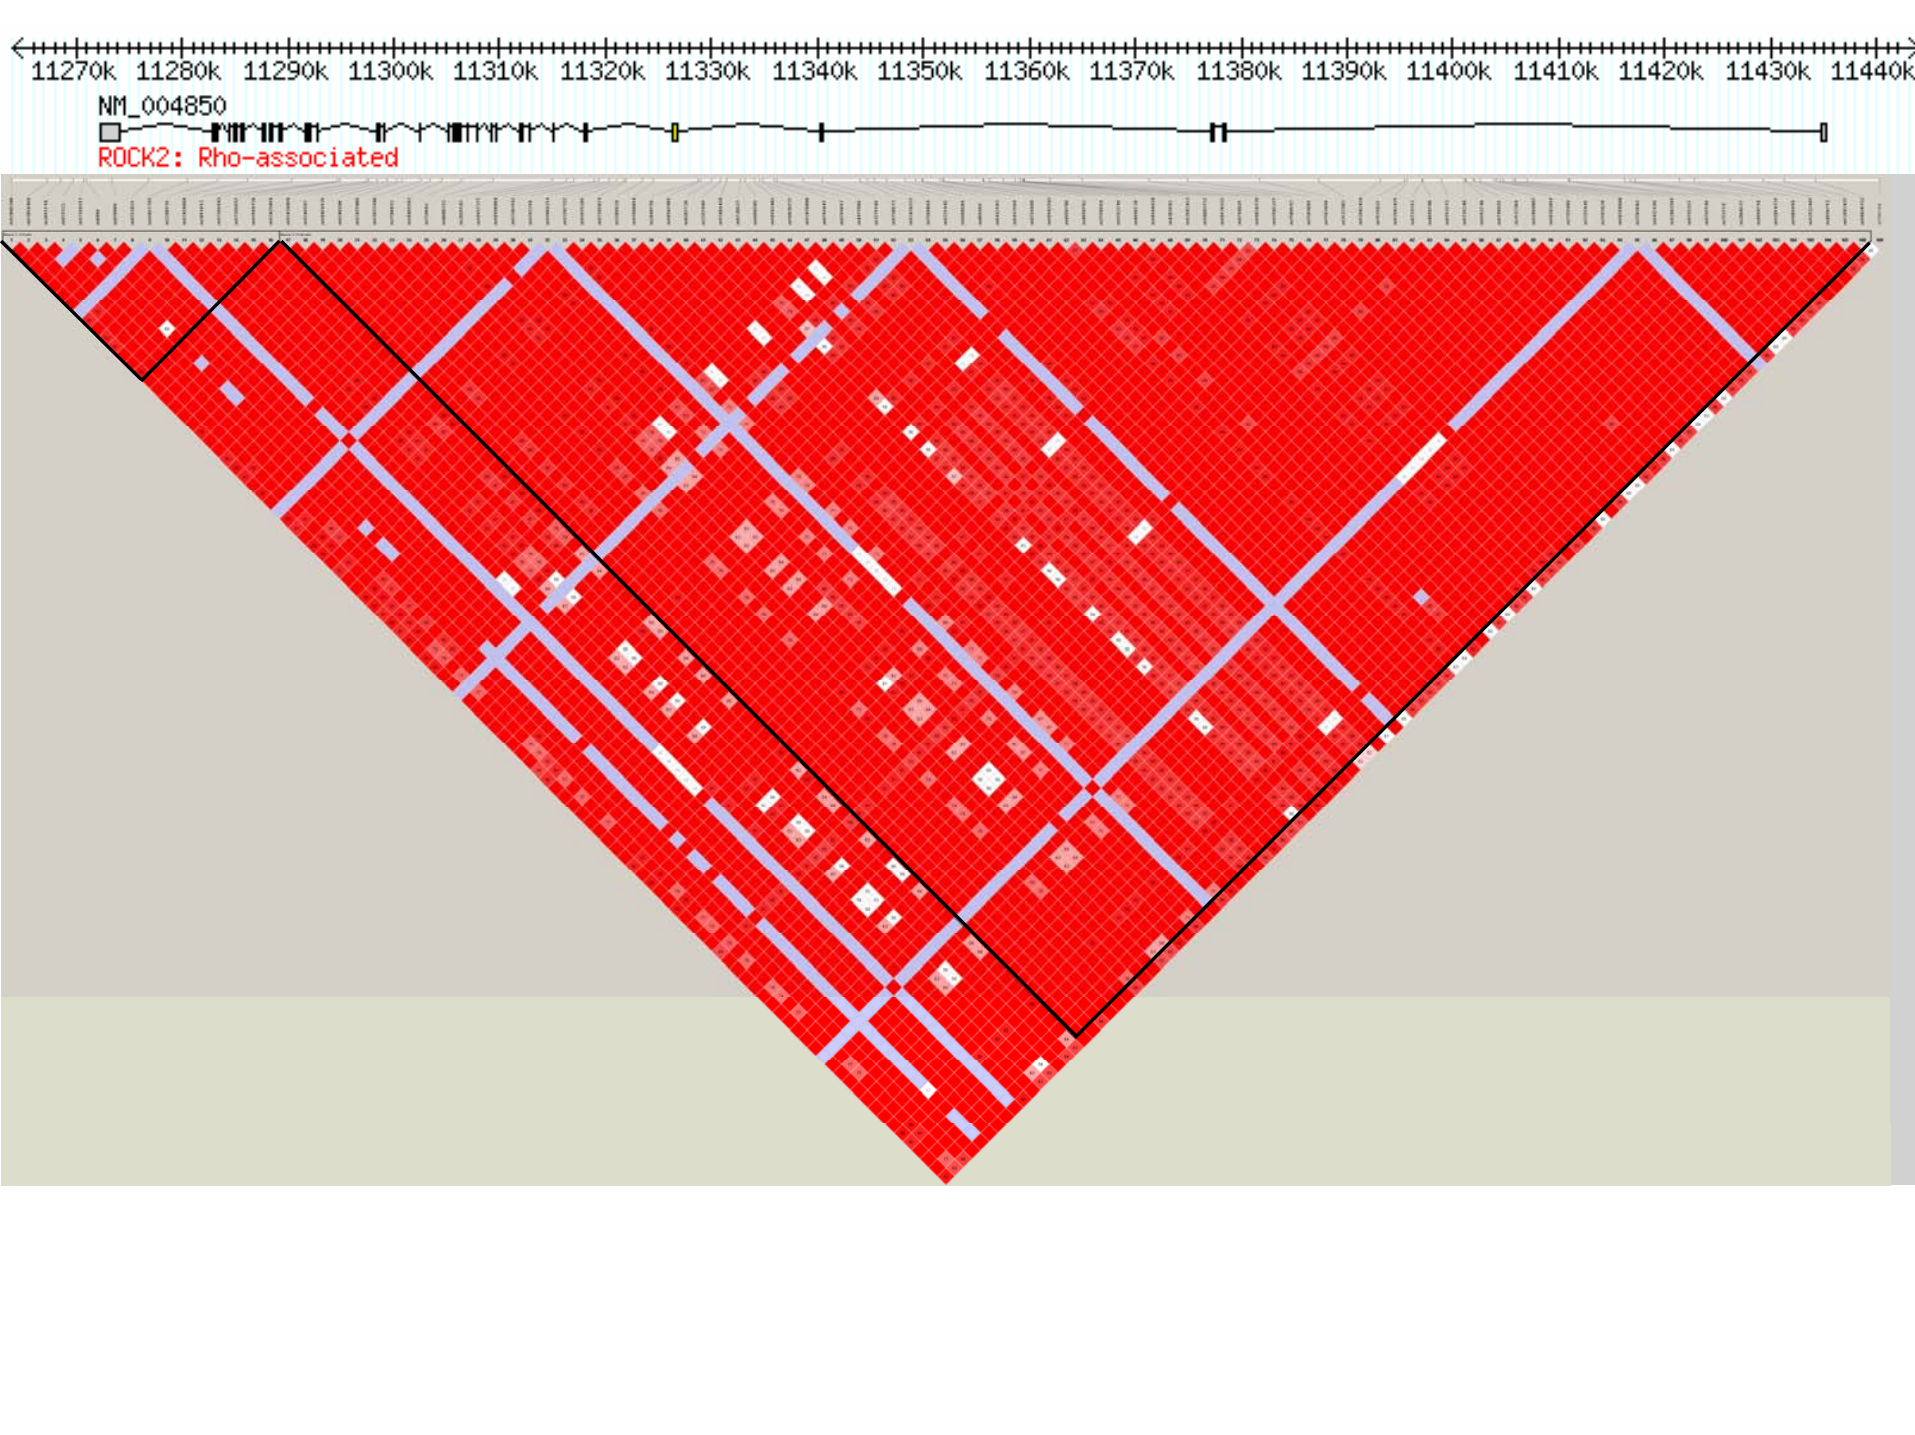



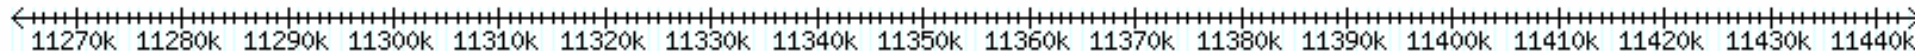

NM\_004850

ROCK2: Rho-associated

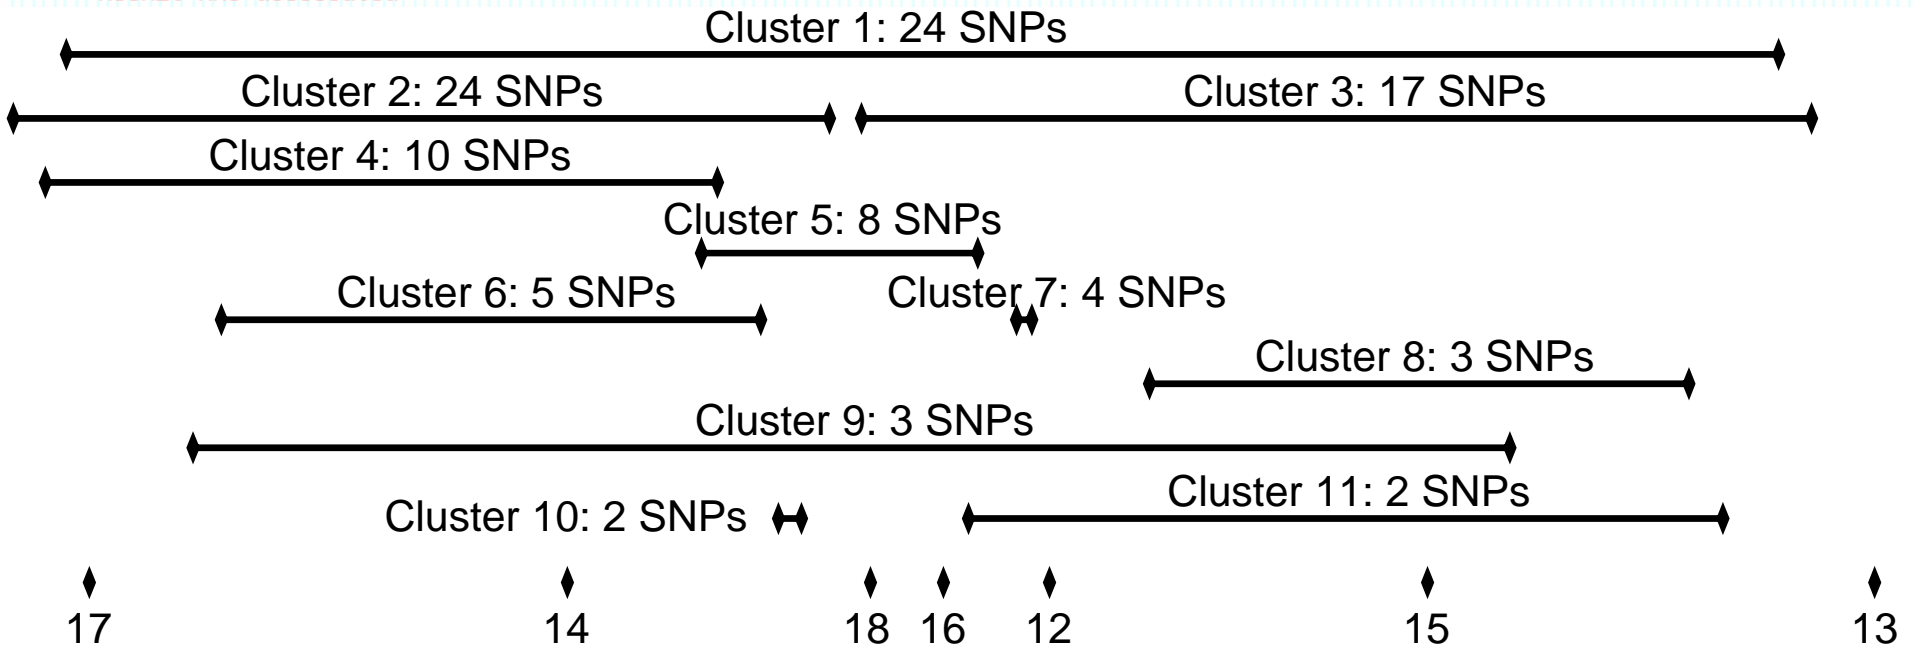

Supplement: NIHMS73256-supplement-Supplementary.pdf [file NIHMS73256-supplement-Supplementary.pdf]
